# Supplementary material
Source: PubMed Central journal article supplement (PMC3635237)
Supplement: ismej2012163x1.pdf [file ismej2012163x1.pdf]

1 **Supplementary Figure 1** Representative methane oxidation time courses of replicate samples  
2 from Pond B sampled in August, 2011, along with one control blank, with the results of linear  
3 regressions.  
4

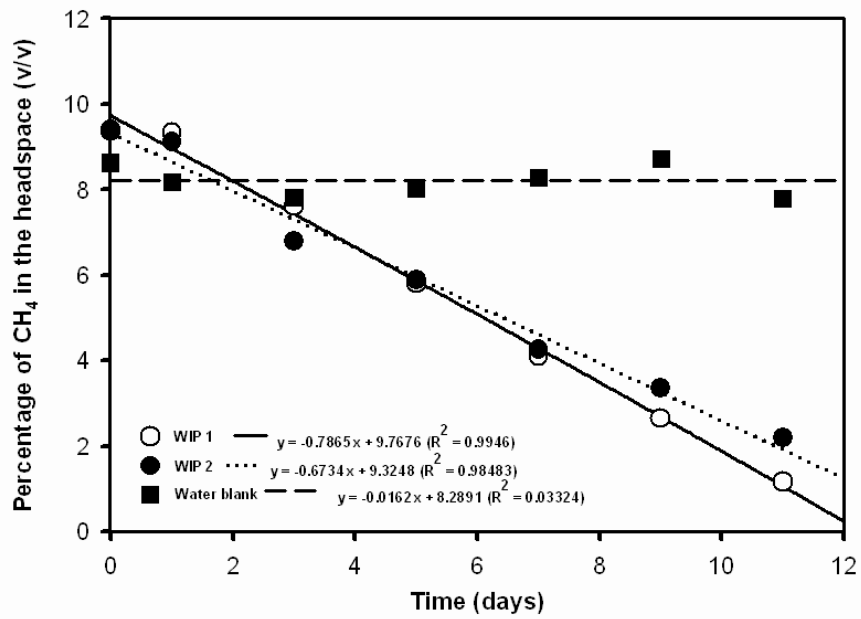

5  
6  
7

1 **Supplementary Figure 2** (next page) Results of *pmoA*-microarray analysis of three samples  
2 from oilsands tailings ponds A and B. Genes were amplified using primers 189f/661r (first 3  
3 rows) or 189f/682r (next 3 rows). The colour gradient represents % of the maximum signal as  
4 achieved by hybridising a pure target against the probe. For details of the probes see Stralis-  
5 Pavese *et al.* (2011). The probe names listed as the column headers are described in detail in  
6 Supplementary Table 5.



1 **Supplementary Table 1:** Chemical analysis of water from the surface 1-m depth of Ponds A and B  
 2 based on measurements made on two dates (Pond A: July 22, 2010 and July 7, 2011; Pond B July  
 3 22, 2010 and June 9, 2011). Data are means and standard errors of duplicates, or are based on a  
 4 single sample where SE is not reported. Data were obtained using standard methods (Syncrude,  
 5 1995).  
 6

|                                                                       | Pond A |        | Pond B |        |
|-----------------------------------------------------------------------|--------|--------|--------|--------|
|                                                                       | Mean   | SE     | Mean   | SE     |
| pH (units)                                                            | 8.0    | 0.0050 | 7.8    | 0.13   |
| Conductivity ( $\mu\text{S cm}^{-1}$ )                                | 3610   | 20.0   | 3120   | 80.2   |
| Temperature ( $^{\circ}\text{C}$ )                                    | 20.0   |        | 21.9   | 1.10   |
| Dissolved solids (%)                                                  | 0.24   | 0.018  | 0.19   | 0.0033 |
| Total solids content (%)                                              | 0.27   |        | 0.23   |        |
| Alkalinity ( $\text{mg L}^{-1}$ )                                     | 1010   | 338    | 840    | 311    |
| Chemical $\text{O}_2$ demand ( $\text{mg L}^{-1}$ )                   | 240    |        | 230    |        |
| Dissolved $\text{O}_2$ at 30-cm depth ( $\text{mg L}^{-1}$ )          | 0.27   |        | 0.030  |        |
| $\text{O}_2$ penetration depth (cm) ( $\leq 0.01 \text{ mg L}^{-1}$ ) | 150    |        | 60     |        |
| Redox potential (mV)                                                  | 54     |        | 148    |        |
| Sulphides ( $\text{mg L}^{-1}$ )                                      | 0.012  | 0.012  | 0.090  | 0.020  |
| Dissolved organic Carbon ( $\text{mg C L}^{-1}$ )                     | 40     | 1.0    | 46     | 2.0    |
| o-Phosphate ( $\text{mg P L}^{-1}$ )                                  | 0.015  | 0.0070 | 0.015  | 0.0045 |
| Ammonia ( $\text{mg N L}^{-1}$ )                                      | 7.8    | 2.0    | 17     | 6.9    |
| Nitrate + Nitrite ( $\text{mg N L}^{-1}$ )                            | 0.015  | 0.0050 | 0.011  | 0.0010 |
| Total Nitrogen ( $\text{mg N L}^{-1}$ )                               | 9.9    | 0.1    | 18     | 8.3    |
| Total major ions ( $\text{mg L}^{-1}$ ) <sup>a</sup>                  | 2770   | 12.4   | 2290   | 27.2   |

7  
 8 <sup>a</sup> Includes  $\text{Na}^+$ ,  $\text{K}^+$ ,  $\text{Mg}^{2+}$ ,  $\text{Ca}^{2+}$ ,  $\text{F}^-$ ,  $\text{Cl}^-$ ,  $\text{Br}^-$ ,  $\text{SO}_4^{2-}$ ,  $\text{CO}_3^{2-}$ ,  $\text{HCO}_3^-$   
 9

10 Syncrude Canada Ltd. (1995). Syncrude analytical methods manual. 4th ed. Syncrude Canada  
 11 Ltd., Edmonton, AB.  
 12  
 13  
 14  
 15

1 **Supplementary Table 2A-D** The top 25 OTUs of each sample site based on % of total reads in  
 2 16S rRNA gene pyrotag sequencing analysis. OTUs were clustered based on 97% identity using  
 3 QIIME. Where multiple samples were obtained from a site the averages equally represent each  
 4 sample. The table is divided into 4 parts based on the sample sites: Table 2A represents the  
 5 natural bitumen samples (n=2), Table 2B is Pond B (n=7); Table 2C is Pond A (n=7); and Table 2D  
 6 is other tailings ponds (n=6)

7  
 8  
 9 **Supplementary Table 2A** Natural bitumen samples from Saline Creek (2 samples, Sept, 2009)  
 10

| Rank | % Reads | Phylum                | Class                      | Order                     | Family                        | Genus                    |
|------|---------|-----------------------|----------------------------|---------------------------|-------------------------------|--------------------------|
| 1    | 4.88    | <i>Proteobacteria</i> | <i>Gammaproteobacteria</i> | <i>Methylococcales</i>    | <i>Crenotrichaceae</i>        | <i>Crenothrix</i>        |
| 2    | 2.21    | <i>Proteobacteria</i> | <i>Gammaproteobacteria</i> | <i>Chromatiales</i>       | <i>Ectothiorhodospiraceae</i> |                          |
| 3    | 2.00    | <i>Proteobacteria</i> | <i>Gammaproteobacteria</i> | <i>Methylococcales</i>    | <i>Crenotrichaceae</i>        | <i>Crenothrix</i>        |
| 4    | 1.84    | <i>Proteobacteria</i> | <i>Betaproteobacteria</i>  | <i>Rhodocyclales</i>      |                               |                          |
| 5    | 1.81    | <i>Actinobacteria</i> | <i>Actinobacteria</i>      | <i>Acidimicrobiales</i>   |                               |                          |
| 6    | 1.74    | <i>Proteobacteria</i> | <i>Gammaproteobacteria</i> | <i>Methylococcales</i>    | <i>Methylococcaceae</i>       |                          |
| 7    | 1.69    | <i>Proteobacteria</i> | <i>Deltaproteobacteria</i> |                           |                               |                          |
| 8    | 1.50    | <i>Proteobacteria</i> | <i>Gammaproteobacteria</i> | <i>Chromatiales</i>       |                               |                          |
| 9    | 1.29    | <i>Actinobacteria</i> | <i>Actinobacteria</i>      | <i>Acidimicrobiales</i>   | EB1017                        |                          |
| 10   | 0.96    | <i>Proteobacteria</i> | <i>Gammaproteobacteria</i> | <i>Methylococcales</i>    | <i>Methylococcaceae</i>       |                          |
| 11   | 0.95    | <i>Chloroflexi</i>    | SOGA31                     |                           |                               |                          |
| 12   | 0.94    | <i>Proteobacteria</i> | <i>Gammaproteobacteria</i> | <i>Methylococcales</i>    | <i>Crenotrichaceae</i>        | <i>Crenothrix</i>        |
| 13   | 0.92    | <i>Proteobacteria</i> | <i>Alphaproteobacteria</i> | <i>Rhodospirillales</i>   | <i>Rhodospirillaceae</i>      |                          |
| 14   | 0.80    | <i>Chloroflexi</i>    | SOGA31                     |                           |                               |                          |
| 15   | 0.67    | <i>Proteobacteria</i> | <i>Alphaproteobacteria</i> | <i>Rhizobiales</i>        |                               |                          |
| 16   | 0.56    | <i>Proteobacteria</i> | <i>Betaproteobacteria</i>  | <i>Burkholderiales</i>    |                               | <i>Methylbium</i>        |
| 17   | 0.54    | <i>Proteobacteria</i> | <i>Betaproteobacteria</i>  | <i>Burkholderiales</i>    | <i>Oxalobacteraceae</i>       |                          |
| 18   | 0.53    | <i>Bacteroidetes</i>  | <i>Sphingobacteria</i>     | <i>Sphingobacteriales</i> | <i>Flexibacteraceae</i>       | <i>Cytophaga</i>         |
| 19   | 0.51    | <i>Bacteroidetes</i>  | <i>Sphingobacteria</i>     | <i>Sphingobacteriales</i> | <i>Flexibacteraceae</i>       | <i>Cytophaga</i>         |
| 20   | 0.50    | <i>Chloroflexi</i>    | <i>Anaerolineae</i>        | envOPS12                  |                               |                          |
| 21   | 0.47    | <i>Actinobacteria</i> | <i>Actinobacteria</i>      | <i>Actinomycetales</i>    | <i>Microbacteriaceae</i>      |                          |
| 22   | 0.47    | <i>Proteobacteria</i> | <i>Gammaproteobacteria</i> | <i>Methylococcales</i>    | <i>Crenotrichaceae</i>        | <i>Crenothrix</i>        |
| 23   | 0.46    | <i>Proteobacteria</i> | <i>Alphaproteobacteria</i> | <i>Rhizobiales</i>        | <i>Bradyrhizobiaceae</i>      | <i>Bradyrhizobium</i>    |
| 24   | 0.46    | <i>Proteobacteria</i> | <i>Betaproteobacteria</i>  | <i>Burkholderiales</i>    |                               |                          |
| 25   | 0.46    | <i>Proteobacteria</i> | <i>Betaproteobacteria</i>  | <i>Rhodocyclales</i>      | <i>Rhodocyclaceae</i>         | <i>Methyloversatilis</i> |

11  
 12

1  
2**Supplementary Table 2B** Tailings pond B (7 samples, 2010-2011)

| Rank | % Reads | Phylum                | Class                      | Order                     | Family                          | Genus                   |
|------|---------|-----------------------|----------------------------|---------------------------|---------------------------------|-------------------------|
| 1    | 18.15   | <i>Proteobacteria</i> | <i>Betaproteobacteria</i>  | <i>Burkholderiales</i>    | <i>Comamonadaceae</i>           |                         |
| 2    | 16.37   | <i>Proteobacteria</i> | <i>Betaproteobacteria</i>  | <i>Rhodocyclales</i>      | <i>Rhodocyclaceae</i>           |                         |
| 3    | 5.39    | <i>Proteobacteria</i> | <i>Betaproteobacteria</i>  | <i>Burkholderiales</i>    | <i>Comamonadaceae</i>           |                         |
| 4    | 3.52    | <i>Proteobacteria</i> | <i>Betaproteobacteria</i>  | <i>Burkholderiales</i>    | <i>Alcaligenaceae</i>           |                         |
| 5    | 3.45    | <i>Proteobacteria</i> | <i>Alphaproteobacteria</i> | <i>Sphingomonadales</i>   | <i>Erythrobacteraceae</i>       | <i>Erythromicrobium</i> |
| 6    | 2.56    | <i>Proteobacteria</i> | <i>Gammaproteobacteria</i> | <i>Chromatiales</i>       | <i>Chromatiaceae</i>            | <i>Thiocapsa</i>        |
| 7    | 2.16    | <i>Bacteroidetes</i>  | <i>Flavobacteria</i>       | <i>Flavobacteriales</i>   | <i>Flavobacteriaceae</i>        | <i>Flavobacterium</i>   |
| 8    | 1.56    | <i>Bacteroidetes</i>  | <i>Flavobacteria</i>       | <i>Flavobacteriales</i>   | <i>Flavobacteriaceae</i>        | <i>Flavobacterium</i>   |
| 9    | 1.38    | <i>Proteobacteria</i> | <i>Alphaproteobacteria</i> | <i>Rhodospirillales</i>   | <i>Rhodospirillaceae</i>        |                         |
| 10   | 1.18    | <i>Proteobacteria</i> | <i>Betaproteobacteria</i>  | <i>Burkholderiales</i>    | <i>Comamonadaceae</i>           |                         |
| 11   | 1.02    | <i>Tenericutes</i>    | <i>Erysipelotrichi</i>     | <i>Erysipelotrichales</i> | <i>Erysipelotrichaceae</i>      | PSB-M-3                 |
| 12   | 0.87    | <i>Proteobacteria</i> | <i>Deltaproteobacteria</i> | <i>Desulfuromonadales</i> | <i>Geobacteraceae</i>           | <i>Geobacter</i>        |
| 13   | 0.84    | <i>Proteobacteria</i> | <i>Betaproteobacteria</i>  | <i>Burkholderiales</i>    | <i>Comamonadaceae</i>           | <i>Rhodoferax</i>       |
| 14   | 0.82    | <i>Firmicutes</i>     | <i>Clostridia</i>          | <i>Clostridiales</i>      | FamilyXI. <i>Incertae Sedis</i> |                         |
| 15   | 0.80    | <i>Proteobacteria</i> | <i>Alphaproteobacteria</i> | <i>Rhodobacterales</i>    | <i>Rhodobacteraceae</i>         | <i>Rhodobacter</i>      |
| 16   | 0.74    | <i>Acidobacteria</i>  | <i>Chloracidobacteria</i>  |                           |                                 |                         |
| 17   | 0.73    | <i>Proteobacteria</i> | <i>Betaproteobacteria</i>  | <i>Burkholderiales</i>    | <i>Comamonadaceae</i>           | <i>Hydrogenophaga</i>   |
| 18   | 0.72    | <i>Proteobacteria</i> | <i>Alphaproteobacteria</i> | <i>Rhizobiales</i>        | <i>Xanthobacteraceae</i>        | <i>Xanthobacter</i>     |
| 19   | 0.68    | <i>Proteobacteria</i> | <i>Betaproteobacteria</i>  | <i>Burkholderiales</i>    | <i>Comamonadaceae</i>           | <i>Acidovorax</i>       |
| 20   | 0.67    | <i>Proteobacteria</i> | <i>Gammaproteobacteria</i> | <i>Pseudomonadales</i>    | <i>Moraxellaceae</i>            | <i>Acinetobacter</i>    |
| 21   | 0.60    | <i>Proteobacteria</i> | <i>Gammaproteobacteria</i> | <i>Xanthomonadales</i>    | <i>Xanthomonadaceae</i>         | <i>Ancylobacter</i>     |
| 22   | 0.56    | <i>Bacteroidetes</i>  | <i>Flavobacteria</i>       | <i>Flavobacteriales</i>   | <i>Flavobacteriaceae</i>        |                         |
| 23   | 0.52    | <i>Proteobacteria</i> | <i>Betaproteobacteria</i>  | <i>Burkholderiales</i>    | <i>Comamonadaceae</i>           | <i>Rhodoferax</i>       |
| 24   | 0.52    | <i>Proteobacteria</i> | <i>Betaproteobacteria</i>  | <i>Burkholderiales</i>    | <i>Comamonadaceae</i>           |                         |
| 25   | 0.48    | <i>Proteobacteria</i> | <i>Betaproteobacteria</i>  | <i>Burkholderiales</i>    | <i>Comamonadaceae</i>           |                         |

3  
4

1  
2**Supplementary Table 2C** Tailings pond A (7 samples, 2010-2011)

| Rank | % Reads | Phylum                | Class                      | Order                     | Family                    | Genus                               |
|------|---------|-----------------------|----------------------------|---------------------------|---------------------------|-------------------------------------|
| 1    | 21.87   | <i>Proteobacteria</i> | <i>Betaproteobacteria</i>  | <i>Burkholderiales</i>    | <i>Comamonadaceae</i>     |                                     |
| 2    | 3.56    | <i>Acidobacteria</i>  | <i>Chloracidobacteria</i>  |                           |                           |                                     |
| 3    | 3.16    | <i>Euryarchaeota</i>  | <i>Methanomicrobia</i>     | <i>Methanosarcinales</i>  | <i>Methanosaetaceae</i>   | <i>Methanosaeta</i>                 |
| 4    | 2.53    | <i>Bacteroidetes</i>  | <i>Flavobacteria</i>       | <i>Flavobacteriales</i>   | <i>Flavobacteriaceae</i>  |                                     |
| 5    | 2.24    | <i>Bacteroidetes</i>  | <i>Flavobacteria</i>       | <i>Flavobacteriales</i>   | <i>Flavobacteriaceae</i>  | <i>Flavobacterium</i>               |
| 6    | 2.07    | <i>Proteobacteria</i> | <i>Alphaproteobacteria</i> | <i>Rhodospirillales</i>   | <i>Rhodospirillaceae</i>  |                                     |
| 7    | 1.97    | <i>Proteobacteria</i> | <i>Betaproteobacteria</i>  | <i>Burkholderiales</i>    | <i>Comamonadaceae</i>     |                                     |
| 8    | 1.85    | <i>Euryarchaeota</i>  | <i>Methanomicrobia</i>     | <i>Methanosarcinales</i>  | <i>Methanosaetaceae</i>   | <i>Methanosaeta</i>                 |
| 9    | 1.80    | <i>Euryarchaeota</i>  | <i>Methanomicrobia</i>     | <i>Methanomicrobiales</i> |                           | <i>Candidatus<br/>Methanoregula</i> |
| 10   | 1.55    | <i>Proteobacteria</i> | <i>Betaproteobacteria</i>  | <i>Burkholderiales</i>    | <i>Alcaligenaceae</i>     |                                     |
| 11   | 1.49    | <i>Proteobacteria</i> | <i>Gammaproteobacteria</i> | <i>Methylococcales</i>    | <i>Methylococcaceae</i>   | <i>Methylocaldum</i>                |
| 12   | 1.40    | <i>Proteobacteria</i> | <i>Betaproteobacteria</i>  | <i>Burkholderiales</i>    | <i>Comamonadaceae</i>     | <i>Hydrogenophaga</i>               |
| 13   | 1.24    | <i>Actinobacteria</i> | <i>Actinobacteria</i>      | <i>Actinomycetales</i>    |                           |                                     |
| 14   | 1.18    | <i>Proteobacteria</i> | <i>Betaproteobacteria</i>  | <i>Rhodocyclales</i>      | <i>Rhodocyclaceae</i>     |                                     |
| 15   | 1.13    | <i>Proteobacteria</i> | <i>Betaproteobacteria</i>  | <i>Burkholderiales</i>    | <i>Burkholderiaceae</i>   |                                     |
| 16   | 0.94    | <i>Proteobacteria</i> | <i>Betaproteobacteria</i>  | <i>Rhodocyclales</i>      | <i>Rhodocyclaceae</i>     | <i>Methyloversatilis</i>            |
| 17   | 0.84    | <i>Proteobacteria</i> | <i>Betaproteobacteria</i>  | <i>Methylophilales</i>    | <i>Methylophilaceae</i>   |                                     |
| 18   | 0.84    | <i>Proteobacteria</i> | <i>Betaproteobacteria</i>  | <i>Burkholderiales</i>    | <i>Comamonadaceae</i>     | <i>Limnohabitans</i>                |
| 19   | 0.83    | <i>Proteobacteria</i> | <i>Betaproteobacteria</i>  | <i>Burkholderiales</i>    | <i>Burkholderiaceae</i>   | <i>Limnobacter</i>                  |
| 20   | 0.73    | <i>Proteobacteria</i> | <i>Alphaproteobacteria</i> | <i>Rhizobiales</i>        | <i>Xanthobacteraceae</i>  | <i>Xanthobacter</i>                 |
| 21   | 0.71    | <i>Proteobacteria</i> | <i>Betaproteobacteria</i>  | <i>Burkholderiales</i>    | <i>Comamonadaceae</i>     | <i>Rhodoferax</i>                   |
| 22   | 0.69    | <i>Bacteroidetes</i>  | <i>Flavobacteria</i>       | <i>Flavobacteriales</i>   | <i>Flavobacteriaceae</i>  | <i>Flavobacterium</i>               |
| 23   | 0.65    | <i>Proteobacteria</i> | <i>Gammaproteobacteria</i> | <i>Pseudomonadales</i>    | <i>Pseudomonadaceae</i>   | <i>Pseudomonas</i>                  |
| 24   | 0.54    | <i>Proteobacteria</i> | <i>Alphaproteobacteria</i> | <i>Sphingomonadales</i>   | <i>Sphingomonadaceae</i>  |                                     |
| 25   | 0.52    | <i>Proteobacteria</i> | <i>Alphaproteobacteria</i> | <i>Sphingomonadales</i>   | <i>Erythrobacteraceae</i> | <i>Erythromicrobium</i>             |

3  
4  
5  
6

1  
2**Supplementary Table 2D** Various tailings ponds (6 samples from 2 ponds, Sept, 2009)

| Rank | % Reads | Phylum                | Class                      | Order                     | Family                     | Genus                   |
|------|---------|-----------------------|----------------------------|---------------------------|----------------------------|-------------------------|
| 1    | 11.89   | <i>Proteobacteria</i> | <i>Betaproteobacteria</i>  | <i>Rhodocyclales</i>      | <i>Rhodocyclaceae</i>      | <i>Thauera</i>          |
| 2    | 10.48   | <i>Proteobacteria</i> | <i>Betaproteobacteria</i>  | <i>Rhodocyclales</i>      | <i>Rhodocyclaceae</i>      |                         |
| 3    | 7.96    | <i>Proteobacteria</i> | <i>Gammaproteobacteria</i> | <i>Chromatiales</i>       | <i>Chromatiaceae</i>       | <i>Thiocapsa</i>        |
| 4    | 3.79    | <i>Proteobacteria</i> | <i>Deltaproteobacteria</i> | <i>Desulfuromonadales</i> | <i>Geobacteraceae</i>      | <i>Geobacter</i>        |
| 5    | 3.32    | <i>Proteobacteria</i> | <i>Betaproteobacteria</i>  | <i>Burkholderiales</i>    | <i>Comamonadaceae</i>      |                         |
| 6    | 2.39    | <i>Actinobacteria</i> | <i>Actinobacteria</i>      | <i>Actinomycetales</i>    | ACK-M1                     |                         |
| 7    | 2.01    | <i>Proteobacteria</i> | <i>Betaproteobacteria</i>  | <i>Burkholderiales</i>    | <i>Comamonadaceae</i>      | <i>Limnohabitans</i>    |
| 8    | 1.69    | <i>Proteobacteria</i> | <i>Betaproteobacteria</i>  | <i>Rhodocyclales</i>      | <i>Rhodocyclaceae</i>      | <i>Thauera</i>          |
| 9    | 1.55    | <i>Bacteroidetes</i>  | <i>Flavobacteria</i>       | <i>Flavobacteriales</i>   | <i>Flavobacteriaceae</i>   | <i>Flavobacterium</i>   |
| 10   | 0.98    | <i>Proteobacteria</i> | <i>Alphaproteobacteria</i> | <i>Sphingomonadales</i>   | <i>Sphingomonadaceae</i>   |                         |
| 11   | 1.01    | <i>Bacteroidetes</i>  | <i>Flavobacteria</i>       |                           |                            |                         |
| 12   | 0.92    | <i>Proteobacteria</i> | <i>Betaproteobacteria</i>  | <i>Rhodocyclales</i>      | <i>Rhodocyclaceae</i>      |                         |
| 13   | 0.85    | <i>Proteobacteria</i> | <i>Betaproteobacteria</i>  | <i>Burkholderiales</i>    | <i>Alcaligenaceae</i>      |                         |
| 14   | 0.84    | <i>Proteobacteria</i> | <i>Betaproteobacteria</i>  | <i>Burkholderiales</i>    | <i>Burkholderiaceae</i>    | <i>Polynucleobacter</i> |
| 15   | 0.83    | <i>Proteobacteria</i> | <i>Deltaproteobacteria</i> | <i>Desulfobacterales</i>  | <i>Desulfobulbaceae</i>    | <i>Desulfocapsa</i>     |
| 16   | 0.82    | <i>Proteobacteria</i> | <i>Betaproteobacteria</i>  | <i>Rhodocyclales</i>      | <i>Rhodocyclaceae</i>      | <i>Thauera</i>          |
| 17   | 0.7     | <i>Proteobacteria</i> | <i>Deltaproteobacteria</i> | <i>Desulfovibrionales</i> | <i>Desulfomicrobiaceae</i> | <i>Desulfomicrobium</i> |
| 18   | 0.58    | <i>Spirochaetes</i>   | <i>Spirochaetes</i>        | <i>Sphaerochaetales</i>   | <i>Sphaerochaetaceae</i>   | <i>Sphaerochaeta</i>    |
| 19   | 0.57    | <i>Bacteroidetes</i>  | <i>Bacteroidia</i>         | <i>Bacteroidales</i>      |                            |                         |
| 20   | 0.55    | <i>Proteobacteria</i> | <i>Betaproteobacteria</i>  | <i>Burkholderiales</i>    | <i>Comamonadaceae</i>      |                         |
| 21   | 0.57    | <i>Proteobacteria</i> | <i>Betaproteobacteria</i>  | <i>Rhodocyclales</i>      | <i>Rhodocyclaceae</i>      | <i>Thauera</i>          |
| 22   | 0.55    | <i>Proteobacteria</i> | <i>Gammaproteobacteria</i> | <i>Aeromonadales</i>      | <i>Aeromonadaceae</i>      | <i>Aeromonas</i>        |
| 23   | 0.54    | <i>Proteobacteria</i> | <i>Betaproteobacteria</i>  | <i>Burkholderiales</i>    |                            | <i>Aquabacterium</i>    |
| 24   | 0.53    | <i>Proteobacteria</i> | <i>Alphaproteobacteria</i> | <i>Rhodobacterales</i>    | <i>Rhodobacteraceae</i>    |                         |
| 25   | 0.53    | <i>Proteobacteria</i> | <i>Deltaproteobacteria</i> | <i>Desulfobacterales</i>  | <i>Desulfobulbaceae</i>    | <i>Desulfocapsa</i>     |

3  
4



1 **Supplementary Table 3** Summary of the genera of methanotrophs (and the *Methylophilaceae*  
2 family of methylotrophs) detected in the heavy fractions of 5 separate SIP incubations using the  
3 surface waters of Ponds A and B. Two SIP experiments that were heavily grazed based on large  
4 proportions of amoebae detected in the heavy fraction are not included.  
5

|                               | Mean  | SE     |
|-------------------------------|-------|--------|
| <i>Methylocaldum</i>          | 17.4  | 1.93   |
| <i>Methylomonas</i>           | 42.5  | 4.22   |
| <i>Methylomicrobium</i>       | 2.37  | 0.625  |
| <i>Methylobacter</i>          | 6.10  | 2.23   |
| <i>Crenothrix/Methylosoma</i> | 0.184 | 0.0178 |
| <i>Methylophilaceae</i>       | 7.80  | 0.974  |

6  
7

1 **Supplementary Table 4** 16S rRNA genes, and genes encoding key nitrogen metabolism and  
2 methylotrophy functions detected in the <sup>13</sup>CH<sub>4</sub>-labeled SIP metagenome, and their top BLAST hits  
3 (to a cultured organism) against the non-redundant database. The minimum aligned length was  
4 200 nucleotides (for 16S rRNA) or 50 amino acids (for all protein-encoding genes).  
5

| Contig                     | Gene        | BLAST top hit                                | Identity % | E-value | Length |
|----------------------------|-------------|----------------------------------------------|------------|---------|--------|
| <b>16S rRNA genes</b>      |             |                                              |            |         |        |
| ckmer87_3163               | 16S rRNA    | <i>Methylocaldum tepidum</i> strain LK6      | 94         | 0.0     | 389    |
| ckmer83_2241               | 16S rRNA    | <i>Methylotenera mobilis</i> JLW8            | 96         | 0.0     | 728    |
| ckmer87_1975               | 16S rRNA    | <i>Methylomicrobium kenyense</i>             | 94         | 0.0     | 486    |
| ckmer87_1181               | 16S rRNA    | <i>Methylosarcina lacus</i> strain LW14      | 98         | 0.0     | 388    |
| kmer83_2127001             | 16S rRNA    | <i>Methylococcus mobilis</i>                 | 99         | 0.0     | 341    |
| ckmer79_3890               | 16S rRNA    | <i>Methylovorus</i> sp. MP688                | 96         | 0.0     | 568    |
| kmer79_2448064             | 16S rRNA    | <i>Methylomonas</i> sp. LW16                 | 97         | 0.0     | 386    |
| Kmer63_4200339             | 16S rRNA    | <i>Aquimonas voraii</i> strain GPTSA         | 96         | 4e-177  | 255    |
| Kmer59_4688829             | 16S rRNA    | <i>Porphyrobacter</i> sp. BZ35               | 100        | e-135   | 247    |
| kmer63_4172340             | 16S rRNA    | <i>Methylomicrobium buryaticum</i> strain 7G | 98         | e-123   | 238    |
| ckmer87_4706               | 16S rRNA    | <i>Methylomonas fodinarum</i> strain JB13    | 89         | 9e-88   | 244    |
| kmer87_1766037             | 16S rRNA    | <i>Methylobacter</i> sp. LW12                | 98         | e-108   | 214    |
| kmer87_1822475             | 16S rRNA    | <i>Methylomonas methanica</i>                | 99         | 0.0     | 541    |
| ckmer87_2696               | 16S rRNA    | <i>Pseudomonas putida</i> GB-1               | 90         | e-165   | 342    |
| ckmer79_1140               | 16S rRNA    | <i>Pseudomonas argentinensis</i> strain PA01 | 92         | 0.0     | 786    |
| <b>Methylotrophy genes</b> |             |                                              |            |         |        |
| ckmer79_1733               | <i>pmoA</i> | <i>Methylocaldum</i> sp. T-025               | 87         | e-134   | 274    |
| ckmer87_3841               | <i>pmoA</i> | <i>Methylomicrobium album</i> BG8            | 97         | e-143   | 250    |
| ckmer63_2136               | <i>pmoA</i> | <i>Methylomonas methanica</i> MC09           | 98         | 3e-45   | 89     |
| kmer83_2092985             | <i>pmoA</i> | <i>Methylosoma</i> sp. TFB                   | 87         | 2e-50   | 86     |
| kmer63_4256224             | <i>pmoA</i> | <i>Methylomonas</i> sp. LW13                 | 86         | 2e-067  | 144    |
| kmer59_4724056             | <i>pmoA</i> | <i>Methylomonas</i> sp. M5                   | 96         | 1e-053  | 104    |
| kmer59_4742331             | <i>pmoA</i> | <i>Methylomonas methanica</i>                | 100        | 4e-62   | 113    |
| kmer67_3724384             | <i>pmoA</i> | <i>Methylocaldum</i> sp. T-025               | 91         | 1e-30   | 68     |
| kmer59_4677095             | <i>pmoA</i> | <i>Methylomonas methanica</i>                | 98         | 6e-42   | 77     |
| ckmer79_1733               | <i>pmoB</i> | <i>Methylocaldum</i> sp. T-025               | 87         | e-134   | 247    |
| ckmer87_3841               | <i>pmoB</i> | <i>Methylomicrobium album</i> BG8            | 97         | e-143   | 250    |
| ckmer87_4803               | <i>pmoB</i> | <i>Methylococcus capsulatus</i> str. Bath    | 86         | 2e-037  | 90     |
| kmer83_2122116             | <i>pmoB</i> | <i>Methylococcus capsulatus</i> str. Bath    | 84         | 1e-37   | 90     |
| kmer87_1785776             | <i>pmoB</i> | <i>Methylocaldum</i> sp. T-025               | 73         | 1e-32   | 94     |
| kmer87_1785788             | <i>pmoB</i> | <i>Methylocaldum</i> sp. T-025               | 72         | 9e-32   | 94     |
| kmer87_1781460             | <i>pmoB</i> | <i>Methylococcus capsulatus</i> str. Bath    | 72         | 1e-34   | 91     |
| kmer87_1781266             | <i>pmoB</i> | <i>Methylococcus capsulatus</i> str. Bath    | 71         | 4e-34   | 91     |
| kmer83_2107215             | <i>pmoB</i> | <i>Methylococcus capsulatus</i> str. Bath    | 68         | 1e-30   | 96     |
| kmer59_4653614             | <i>pmoB</i> | <i>Methylococcus capsulatus</i> str. Bath    | 88         | 4e-28   | 69     |
| ckmer87_2237               | <i>pmoB</i> | <i>Methylomicrobium alcaliphilum</i>         | 88         | 1e-26   | 68     |
| ckmer75_2666               | <i>pmoB</i> | <i>Methylomonas</i> sp. LW13                 | 96         | 2e-56   | 107    |
| ckmer87_1889               | <i>pmoC</i> | <i>Methylococcus capsulatus</i> str. Bath    | 86         | 2e-95   | 160    |
| ckmer83_77                 | <i>pmoC</i> | <i>Methylomicrobium album</i> BG8            | 97         | 1e-157  | 225    |
| ckmer67_4696               | <i>pmoC</i> | <i>Methylococcus capsulatus</i>              | 84         | 1e-56   | 96     |
| ckmer87_3382               | <i>pmoC</i> | <i>Methylococcus capsulatus</i>              | 89         | 2e-48   | 97     |
| kmer67_3793325             | <i>pmoC</i> | <i>Methylococcus capsulatus</i>              | 70         | 3e-24   | 81     |
| kmer87_1772609             | <i>pmoC</i> | <i>Methylomicrobium alcaliphilum</i>         | 98         | 8e-25   | 53     |
| ckmer79_1733               | <i>pmoC</i> | <i>Methylocaldum</i> sp. T-025               | 87         | e-134   | 247    |
| ckmer67_808                | <i>pmoC</i> | <i>Methylococcus capsulatus</i> str. Bath    | 67         | 4e-13   | 52     |
| ckmer872165                | <i>glyA</i> | <i>Methylomicrobium alcaliphilum</i>         | 87         | 0.0     | 416    |
| ckmer833613                | <i>sga</i>  | <i>Methylomicrobium alcaliphilum</i>         | 79         | 0.0     | 387    |
| ckmer872620                | <i>sga</i>  | <i>Methylococcus capsulatus</i>              | 81         | 2e-111  | 187    |
| ckmer87_199                | <i>hpr</i>  | <i>Methylomicrobium alcaliphilum</i>         | 75         | 0.0     | 323    |
| kmer59_4774671             | <i>hpr</i>  | <i>Methylomicrobium alcaliphilum</i>         | 71         | 3e-91   | 191    |
| ckmer87_1730               | <i>mxal</i> | <i>Methylococcus capsulatus</i>              | 57         | 1e-75   | 240    |
| ckmer87_1730               | <i>mxac</i> | <i>Methylococcus capsulatus</i>              | 58         | 1e-079  | 275    |
| ckmer87_1730               | <i>mxar</i> | <i>Methylococcus capsulatus</i>              | 56         | e-107   | 336    |
| ckmer87_1730               | <i>mxaj</i> | <i>Methylococcus capsulatus</i>              | 79         | 2e-059  | 137    |
| ckmer87_1730               | <i>mxaj</i> | <i>Methylobacter tundripaludum</i>           | 55         | 1e-82   | 257    |
| ckmer87_1730               | <i>mxaf</i> | <i>Methylococcus capsulatus</i>              | 87         | 0.0     | 573    |
| ckmer87_781                | <i>mxae</i> | <i>Methylobacillus flagellatus</i>           | 84         | 0.0     | 625    |
| ckmer79_3087               | <i>mxaf</i> | <i>Methylococcus capsulatus</i>              | 82         | 0.0     | 599    |
| ckmer79_3087               | <i>mxaj</i> | <i>Methylococcus capsulatus</i>              | 60         | 2e-084  | 247    |
| ckmer87_384                | <i>mxaj</i> | <i>Methylococcus capsulatus</i>              | 50         | 5e-075  | 261    |

|                                  |             |                                      |     |        |     |
|----------------------------------|-------------|--------------------------------------|-----|--------|-----|
| ckmer87_384                      | <i>mxoE</i> | <i>Methylobacter tundripaludum</i>   | 93  | 0.0    | 455 |
| ckmer87_478                      | <i>mxoA</i> | <i>Methylobacter sp.</i>             | 30  | 1e-28  | 286 |
| ckmer87_1247                     | <i>mxoD</i> | <i>Methylococcus capsulatus</i>      | 61  | 8e-051 | 159 |
| ckmer87_781                      | <i>xoxF</i> | <i>Methylobacillus flagellatus</i>   | 84  | 0.0    | 625 |
| ckmer79_3087                     | <i>xoxF</i> | <i>Methylococcus capsulatus</i>      | 82  | 0.0    | 599 |
| ckmer7930871                     | <i>xoxF</i> | <i>Methylococcus capsulatus</i>      | 82  | 0.0    | 619 |
| ckmer877811                      | <i>xoxF</i> | <i>Methylovorus glucosetrophus</i>   | 86  | 0.0    | 625 |
| ckmer872165                      | <i>mtaA</i> | <i>Methylomonas methanica</i>        | 86  | 0.0    | 325 |
| ckmer793685                      | <i>mtaA</i> | <i>Methylococcus capsulatus</i>      | 65  | 5e-095 | 286 |
| ckmer633897                      | <i>mtaA</i> | <i>Methylomonas methanica</i>        | 94  | 2e-048 | 101 |
| kmer594735825                    | <i>mtaA</i> | <i>Methylobacter tundripaludum</i>   | 92  | 4e-28  | 66  |
| ckmer833088                      | <i>mtaA</i> | <i>Methylomonas methanica</i>        | 86  | 0.0    | 325 |
| ckmer871371                      | <i>mtaB</i> | <i>Methylococcus capsulatus</i>      | 80  | 3e-170 | 300 |
| ckmer83569                       | <i>mtaB</i> | <i>Methylomicrobium alcaliphilum</i> | 86  | 0.0    | 301 |
| ckmer87_108                      | <i>mhc</i>  | <i>Methylobacillus flagellatus</i>   | 87  | e-144  | 325 |
| ckmer87_2998                     | <i>hps</i>  | <i>Methylomonas sp. 16a</i>          | 100 | 2e-148 | 214 |
| ckmer87_189                      | <i>hps</i>  | <i>Methylomicrobium album BG8</i>    | 95  | 5e-120 | 190 |
| <b>Nitrogen metabolism genes</b> |             |                                      |     |        |     |
| kmer59_4774971                   | <i>haoA</i> | <i>Methylomonas sp. 16A</i>          | 96  | 0.0    | 328 |
| ckmer83_3946                     | <i>haoA</i> | <i>Methylomonas sp. 16A</i>          | 99  | e-105  | 182 |
| ckmer83_1928                     | <i>haoA</i> | <i>Methylomonas sp. 16A</i>          | 92  | e-156  | 300 |
| kmer59_4729129                   | <i>haoA</i> | <i>Methylomonas sp. 16A</i>          | 84  | 0.0    | 105 |
| ckmer87_48                       | <i>norB</i> | <i>Methylobacter mobilis JLW8</i>    | 78  | e-151  | 323 |
| ckmer83_2227                     | <i>norB</i> | <i>Methylobacter mobilis JLW8</i>    | 72  | 0.0    | 233 |
| ckmer87_148                      | <i>norB</i> | <i>Methylomicrobium album BG8</i>    | 90  | 0.0    | 345 |

- 1
- 2 *hao* hydroxylamine oxidoreductase
- 3 *nor* nitric oxide reductase
- 4 *pmo* particulate methane monooxygenase
- 5 *glyA* serine hydroxymethyltransferase
- 6 *sgaA* serine-glyoxylate aminotransferase
- 7 *hpr* hydroxypyruvate reductase
- 8 *mxo*, *xox* methanol dehydrogenase
- 9 *mtaA* bifunctional methylene-H4MPT/ methylene-H4F dehydrogenase
- 10 *mtaB* methylene-H4MPT dehydrogenase
- 11 *mch* methenyl-H4MPT cyclohydrolase
- 12 *hps* hexulose phosphate synthase
- 13

1 Supplementary Table 5: Probes used in the *pmoA*-microarray (listed in the the columns of  
 2 Supplementary Figure 2), with intended specificities.

| Order | Name        | Intended specificity                                                                                                           | Sequence 5' → 3'             | L  | GC%  | T <sub>m</sub> |
|-------|-------------|--------------------------------------------------------------------------------------------------------------------------------|------------------------------|----|------|----------------|
| 1     | MbA557      | <i>Methylobacter</i>                                                                                                           | CAATGGCATGATGTTCACTCTGGCT    | 25 | 48.0 | 61.5           |
| 2     | MbA486      | <i>Methylobacter</i>                                                                                                           | AGCATGACATTGACAGCGGTTGTT     | 24 | 45.8 | 61.6           |
| 3     | Mb460       | <i>Methylobacter</i>                                                                                                           | GACAGTTACAGCGTAATCGGTGG      | 24 | 54.2 | 60.9           |
| 4     | Mb_LW12-211 | <i>Methylobacter</i>                                                                                                           | CGTCTTTGGGTTACTGTTGTGCC      | 23 | 52.2 | 60.0           |
| 5     | Mb_SL#3-300 | <i>Methylobacter</i>                                                                                                           | GGCGCTGTTGTTTGTGTATTGGGT     | 24 | 50.0 | 62.2           |
| 6     | Mb_SL299    | soda lake <i>Methylobacter</i> isolates and clones                                                                             | GGGGTGCAACTCTGTGTATCTTAGG    | 25 | 52.0 | 60.5           |
| 7     | Mb_SL#1-418 | soda lake <i>Methylobacter</i> isolates and clones                                                                             | GCGATCGTATTAGACGTTATCCTGATG  | 27 | 44.4 | 58.6           |
| 8     | MmbB284     | <i>Mmb. Buryatense</i> - same region as <i>Jpn284</i> , but 3 MM vs. that one <i>Methylobacter</i> and Japanese strain related | ATCGCATCGCTTGGGGTGCAA        | 21 | 57.1 | 62.5           |
| 9     | Jpn284      | clone Jpn 07061                                                                                                                | ACCGTATCGCATGGGGTG           | 18 | 61.1 | 58.0           |
| 10    | BB51-302    | <i>Methylobacter</i>                                                                                                           | CGGTTGTTTGTGTCTTAGGTCTG      | 23 | 47.8 | 57.2           |
| 11    | Mb267       | <i>Methylobacter</i>                                                                                                           | GCATGCTTGTGGTTCCGTTAC        | 21 | 52.4 | 58.1           |
| 12    | Mb292       | <i>Methylobacter</i>                                                                                                           | CCGTTACCGTCTGCCTTTCCG        | 20 | 60.0 | 59.1           |
| 13    | Mb282       | <i>Methylobacter</i>                                                                                                           | TTACCGTCTGCCTTTCCGGC         | 19 | 57.9 | 58.6           |
| 14    | Mb_URC278   | <i>Methylobacter</i>                                                                                                           | GTTCCGTTACAGACTGCCTTTCCGG    | 24 | 54.2 | 61.3           |
| 15    | 511-436     | <i>Methylobacter</i>                                                                                                           | GTTTTGATGCTGTCTGGCAG         | 20 | 50.0 | 55.5           |
| 16    | 511-436L    | <i>Methylobacter</i> 511 group                                                                                                 | GUUUUGAUGCUGUCUGGCAGCA       | 22 | 50.0 | 60.0           |
| 17    | LP10-424    | <i>Methylobacter</i> LP 10 group                                                                                               | GTACTTGATTGTATCTTGATGCTGTGAC | 28 | 39.3 | 55.7           |
| 18    | LF1a-456    | <i>Methylobacter</i> LF 1a group                                                                                               | CATGGTATTGACTGCTGTTATCGGTG   | 26 | 46.2 | 57.7           |
| 19    | Mb_C11-403  | <i>Methylobacter</i>                                                                                                           | CAAACCTTCATGCCTGGTGCTATCGT   | 25 | 48.0 | 61.4           |
| 20    | Mb380       | <i>M. bacter</i> broad group A universal?                                                                                      | CAGTAAATTTCTGCTTCCCTTCAAATCT | 28 | 35.7 | 55.8           |
| 21    | Mb271       | <i>Methylobacter</i>                                                                                                           | TTGTGGTGGCGTTACCGT           | 18 | 55.6 | 58.0           |
| 22    | S14m2-270   | Marine type Ia cluster, S14m#2                                                                                                 | CTTATGGTACCGTTACAGATTGCCTTA  | 27 | 40.7 | 56.4           |
| 23    | S14m2-406   | Marine type Ia cluster, S14m#2                                                                                                 | TTAATTCCTGGTGCAATTGCACTTGAC  | 27 | 40.7 | 58.3           |
| 24    | PS80-291    | clone PS-80                                                                                                                    | ACCAATAGGCGCAACACTTAGT       | 22 | 45.5 | 58.3           |
| 25    | MS1-440     | Marine type Ia cluster, Marine sediment #1                                                                                     | TGATGTTGTCTGGTAGCTTCACATTAAC | 28 | 39.3 | 57.1           |
| 26    | Mm_pel467   | <i>Methylomicrobium pelagicum</i>                                                                                              | ACTGCGGTAATCGATGGTTTGGC      | 23 | 52.2 | 61.6           |
| 27    | Kuro18-205  | Marine type Ia cluster, Kuro18                                                                                                 | AGACGTTTGTGGGTGACAGTTGC      | 23 | 52.2 | 60.0           |
| 28    | DS1-401     | Deep sea cluster #1                                                                                                            | GCGCGGTAGTTTGTGTTATGGCT      | 23 | 52.2 | 61.7           |
| 29    | Mm531       | <i>Methylomonas</i>                                                                                                            | CTCCATTGCACGTGCCTGTAGA       | 22 | 54.5 | 60.7           |
| 30    | Mm_M430     | <i>Methylomonas</i>                                                                                                            | TGGACGTGATTTTGTGTTGGGCAA     | 25 | 44.0 | 61.6           |
| 31    | Mm_RS311    | <i>Mm. methanica</i> , RS clade(10-286)                                                                                        | CTGTTGTTGCTCTGATGCTGGG       | 22 | 54.5 | 58.6           |
| 32    | Mm_ES294    | <i>Methylomonas</i>                                                                                                            | CCAATCGGTGCAACAATTTCTGTAGT   | 26 | 42.3 | 59.8           |
| 33    | Mm_ES543    | <i>Methylomonas</i>                                                                                                            | GTGCCAGTTGAGTATAACGGCATGA    | 25 | 48.0 | 60.9           |
| 34    | Mm_ES546    | <i>Methylomonas</i>                                                                                                            | CCAGTTGAGTATAACGGCATGATGAT   | 26 | 42.3 | 58.7           |
| 35    | Mm_MV421    | <i>Methylomonas</i>                                                                                                            | CTATCGTGCTGGATAACAATCCTGATGT | 27 | 44.4 | 60.0           |
| 36    | Mm451       | <i>Methylomonas</i>                                                                                                            | CTGATGTTGGGTAACAGCATGACT     | 24 | 45.8 | 58.8           |
| 37    | Mm275       | <i>Methylomonas</i>                                                                                                            | GTGGTGGAGATACCGTTTGCC        | 21 | 57.1 | 59.2           |

|    |              |                                                                        |                             |    |      |      |
|----|--------------|------------------------------------------------------------------------|-----------------------------|----|------|------|
| 38 | Alp7-441     | <i>Alpine soil Methylomonas, Alp#7 (10-282)</i>                        | GATGTTAGGTAACAGCATGACACTGAC | 27 | 44.4 | 57.4 |
| 39 | peat_1_3-287 | <i>Methylomonas</i> -related peat clones                               | AACTGCCTTTAGGCGCTACC        | 20 | 55.0 | 58.6 |
| 40 | Est514       | <i>Methylochromium</i> -related clones                                 | AATTGGCCTATGGTTGCGCC        | 20 | 55.0 | 59.9 |
| 41 | Mmb259       | <i>Methylochromium album</i> + Landfill <i>M. microbia</i>             | CTGTTCAAGCAGTTGTGTGGTATCG   | 25 | 48.0 | 59.8 |
| 42 | Mmb303       | <i>Methylochromium album</i>                                           | CAATGCTGGCTGTTCTGGGC        | 20 | 60.0 | 60.3 |
| 43 | Mmb304       | <i>Methylochromium album</i> + Landfill <i>M. microbia</i> and related | ATGCTGGCTGTTCTGGGCTTG       | 21 | 57.1 | 60.6 |
| 44 | LW14-639     | <i>Methylochromium LW14</i> group                                      | AAAAGGUACUUGGAGAACCUUCGGU   | 25 | 44.0 | 60.0 |
| 45 | Mmb_RS2-443  | <i>Methylochromium, Mmb_RS2</i>                                        | TGCTGGGCAACAGCATGCAGT       | 21 | 57.1 | 62.8 |
| 46 | Mmb562       | <i>Mmb. album</i> and <i>Methylosarcina</i>                            | ATGGTAATGACCCCTGGCTGACTTG   | 24 | 50.0 | 60.6 |
| 47 | Mm229        | <i>Deep-branching M. monas</i> (?) group ( <i>WHmb3</i> related group) | CCAATCGTTGGAATCACTTTCCAGC   | 26 | 50   | 60.2 |
| 48 | MsQ290       | <i>M. sarcina quisquiliarum</i> related                                | TGCCATTCGGCGCTGTAATTTAGTA   | 26 | 46.2 | 60.8 |
| 49 | MsQ295       | <i>M. sarcina quisquiliarum</i>                                        | CGGCGCGGTTCTTTCTGTACTG      | 22 | 59.1 | 60.6 |
| 50 | LP20-644     | <i>Methylochromium</i> -related clones                                 | GTACACTGCGTACTTTGCGTAA      | 22 | 45.5 | 56.0 |
| 51 | LP20-607     | <i>LP20</i> group (Type Ia, deep branching- <i>Mmb</i> ?)              | ACTGGTATGCCTGAATACATCCGTA   | 25 | 44   | 57.4 |
| 52 | Ia193        | Type Ia ( <i>M. bacter-M. monas-M. microbium</i> )                     | GACTGGAAAGATAGACGTCTATGGG   | 25 | 48.0 | 57.8 |
| 53 | Ia575        | Type Ia ( <i>M. bacter-M. monas-M. microbium-M. sarcina</i> )          | TGGCTGACTTGCAAGGTTACCAC     | 23 | 52.2 | 61.3 |
| 54 | Bsed516      | <i>Marine sediment #2, Bsed</i>                                        | AACTGGCCAATGGTTGCTCCA       | 21 | 52.4 | 59.9 |
| 55 | SW11-375     | <i>Marine sediment #2, SW#1</i>                                        | TGCTGGCGCTATGGGTTGG         | 19 | 63.2 | 60.9 |
| 56 | SW11-377     | <i>Marine sediment #2, SW#1</i>                                        | TGGCGCTATGGGTTGGGTT         | 20 | 60   | 62.1 |
| 57 | Nc_oce426    | <i>Nitrosococcus oceani</i>                                            | CTTGGATGCCATGCTTGCGA        | 20 | 55.0 | 59.8 |
| 58 | DS2-287      | <i>Deep sea #2, subgroup (N. coccus and Deep sea Type Ia 10-298)</i>   | GAATCCCATTTGGCGGACTTTGTG    | 25 | 52   | 61.0 |
| 59 | AIMS1-442    | <i>Deep sea #2, AIMS#1</i>                                             | TTGTTGACAGGTAGCTATTTGGCAAC  | 26 | 42.3 | 57.7 |
| 60 | DS2-220      | <i>Deep sea #2, subgroup</i>                                           | ACGGTGACTCCGATTGTGTGTAT     | 23 | 47.8 | 58.2 |
| 61 | DS2-626      | <i>Deep sea #2, subgroup</i>                                           | ATTGCTGGTCTGCATCAGCCTG      | 22 | 54.5 | 60.2 |
| 62 | USCG-225     | Upland soil cluster Gamma                                              | CTGACGCCGATCATGTGCAT        | 20 | 55.0 | 59.1 |
| 63 | USCG-225b    | Upland soil cluster Gamma                                              | CTGACGCCGATCATGTGCATCA      | 22 | 54.5 | 61.2 |
| 64 | JR2-409      | JR cluster #2 (California upland grassland soil)                       | TTATTTCCCGCGCTATCATGATCG    | 24 | 50.0 | 60.5 |
| 65 | JR2-468      | JR cluster #2 (California upland grassland soil)                       | ACAGCCATAATTGGACCATTCTTCTG  | 26 | 42.3 | 59.2 |
| 66 | JR3-505      | JR cluster #3 (California upland grassland soil)                       | TGTATCTACCAATTGGCCTCATCTG   | 26 | 46.2 | 60.1 |
| 67 | JR3-593      | JR cluster #3 (California upland grassland soil)                       | CTATCAGTATGTGCGGACAGGC      | 22 | 54.5 | 58.6 |
| 68 | 501-375      | <i>Methylococcus</i> - related marine and freshwater sediment clones   | CTTCCCGGTGAACCTTCGTGTTCC    | 23 | 56.5 | 61.3 |
| 69 | 501-286      | <i>Methylococcus</i> - related marine and freshwater sediment clones   | GTCAGCCGTGGGGCGCCA          | 18 | 77.8 | 66.7 |
| 70 | USCG-305     | Upland soil cluster #3                                                 | CACGGTCTGCGTTCTGGC          | 18 | 66.7 | 59.5 |
| 71 | Mc396        | <i>Methylococcus</i>                                                   | CCCTGCCTCGCTGGTGCC          | 18 | 77.8 | 64.4 |
| 72 | MclT272      | <i>Methylocaldum tepidum</i>                                           | GGCTTGGGAGCGGTTCCG          | 18 | 72.2 | 61.9 |
| 73 | MclG281      | <i>Methylocaldum gracile</i>                                           | AAAGTTCCGCAACCCCTGGG        | 20 | 60.0 | 61.5 |
| 74 | MclS402      | <i>Methylocaldum szegediense</i>                                       | GCGCTGTTGGTTCCGGGT          | 18 | 66.7 | 61.8 |

|     |           |                                                                                                                              |                             |    |      |      |
|-----|-----------|------------------------------------------------------------------------------------------------------------------------------|-----------------------------|----|------|------|
| 75  | MclS394   | <i>Methylocaldum</i><br><i>szegeiensense</i> and related                                                                     | TTCCCGGCGCTGTTGGTTCC        | 20 | 65   | 63.3 |
| 76  | MclS400   | <i>Methylocaldum</i><br><i>szegeiensense</i> and related                                                                     | CGGCGCTGTTGGTTCCGGGT        | 20 | 70   | 65.7 |
| 77  | MclE302   | <i>Methylocaldum</i> E10                                                                                                     | CGCAACCATGGCCGTTCTG         | 19 | 63.2 | 60.3 |
| 78  | Mcl404    | <i>Mcl.tepidum</i> - <i>Mcl. Gracile</i> -<br><i>Mcl.Szeg</i> and related                                                    | TTTTGGTTCCGGGTGCGATTT       | 21 | 47.6 | 58.0 |
| 79  | Mcl408    | <i>Methylocaldum</i><br>fw-1 group: <i>M.coccus</i> -<br><i>M.caldum</i> related marine<br>and freshwater sediment<br>clones | GGTTCGGGTGCGATTTTG          | 19 | 57.9 | 57.8 |
| 80  | fw1-286   | fw-1 group: <i>M.coccus</i> -<br><i>M.caldum</i> related marine<br>and freshwater sediment<br>clones                         | ATCGTCAACCGTGGGGCG          | 18 | 66.7 | 61.1 |
| 81  | fw1-639   | fw-1 group: <i>M.coccus</i> -<br><i>M.caldum</i> related marine<br>and freshwater sediment<br>clones                         | GAAGGGCACGCTGCGTACG         | 19 | 68.4 | 62.0 |
| 82  | fw1-641   | fw-1 group: <i>M.coccus</i> -<br><i>M.caldum</i> related marine<br>and freshwater sediment<br>clones                         | AGGGCACGCTGCGTACGTT         | 19 | 63.2 | 63.3 |
| 83  | JHTY1-267 | <i>JH-TY#1</i>                                                                                                               | TTGGTTGTGGGAAAACCTCCGT      | 22 | 45.5 | 57.4 |
| 84  | JRC4-432  | Japanese rice cluster #4                                                                                                     | GACGTTGTCCTGGCTCTGAG        | 20 | 60.0 | 58.3 |
| 85  | OSC220    | Finnish organic soil clones<br>and related                                                                                   | TCACCGTCGTACCTATCGTACTGG    | 24 | 54.2 | 60.8 |
| 86  | OSC300    | Finnish organic soil clones<br>and related                                                                                   | GGCGCCACCGTATGTGTA CTG      | 21 | 61.9 | 61.4 |
| 87  | JRC3-535  | Japanese Rice Cluster #3                                                                                                     | CGTTCACGTTCCGGTTGAG         | 20 | 60.0 | 59.3 |
| 88  | LK580     | fw-1 group + Lake<br>Konstanz sediment cluster                                                                               | CCGACATCATTGGCTACA ACTATGT  | 25 | 44.0 | 58.7 |
| 89  | RSM1-419  | <i>RSM#1</i>                                                                                                                 | CCATTCTGCTCGACGTGGTTCT      | 22 | 54.5 | 59.4 |
| 90  | JHTY2-562 | <i>JH-TY#2</i>                                                                                                               | ATGCTGTTGTGCGATCGCCGACTTGC  | 25 | 56.0 | 63.6 |
| 91  | JHTY2-578 | <i>JH-TY#2</i>                                                                                                               | CCGACTTGCAAGGCTACA ACTATGTC | 26 | 50.0 | 59.5 |
| 92  | JRC2-447  | Japanese Rice Cluster #2                                                                                                     | CTGAGCACCAGCTACCTGTTCA      | 22 | 54.5 | 60.2 |
| 93  | LW21-374  | LW21 group                                                                                                                   | CTACTTCCCGATCACCATGTGCT     | 23 | 52.2 | 60.2 |
| 94  | LW21-391  | LW21 group                                                                                                                   | TGTGCTTCCCTCGCAGATC         | 20 | 60.0 | 60.5 |
| 95  | M90-574   | <i>M.coccus</i> - <i>M.caldum</i><br>related marine and<br>freshwater sediment clones                                        | ATCGCCGACCTGCTGGGTTA        | 20 | 60.0 | 62.2 |
| 96  | M90-253   | <i>M.coccus</i> - <i>M.caldum</i><br>related marine and<br>freshwater sediment clones                                        | GCTGCTGTACAGGCGTTCCTG       | 21 | 61.9 | 61.7 |
| 97  | Mth413    | <i>Methylothermus</i>                                                                                                        | CACATGGCGATCTTTTTAGACGTTG   | 25 | 44.0 | 58.3 |
| 98  | Mha-500   | <i>Methylohalobius</i> -<br><i>M.thermus</i> and related ?                                                                   | TGATGTACCCGGGCAACTGGC       | 21 | 61.9 | 62.3 |
| 99  | DS3-446   | Deep sea cluster #3                                                                                                          | AGCTGTCTGGCAGTTTCCTGTTCA    | 24 | 50.0 | 62.5 |
| 100 | PmoC640   | <i>PmoC</i>                                                                                                                  | AAGGGAACGCTTCGTACGTTTGG     | 23 | 52.2 | 59.8 |
| 101 | PmoC308   | <i>PmoC</i>                                                                                                                  | CCTGTGTGCTGGCGATTCTGCT      | 22 | 62.3 | 59.1 |
| 102 | lb453     | Type I b ( <i>M.thermus</i> -<br><i>M.coccus</i> - <i>M.caldum</i> and<br>related)                                           | GGCAGCTACCTGTTCACCGC        | 20 | 65.0 | 61.7 |
| 103 | lb559     | Type I b ( <i>M.thermus</i> -<br><i>M.coccus</i> - <i>M.caldum</i> and<br>related)                                           | GGCATGCTGATGTCGATTGCCG      | 22 | 59.1 | 62.5 |
| 104 | McyB304   | <i>M.cystis B</i><br>( <i>parvus/echinoides</i> /strain<br>M)                                                                | CGTTTTCGCGGCTCTGGGC         | 19 | 68.4 | 62.7 |
| 105 | Mcy255    | <i>M.cystis B</i><br>( <i>parvus/echinoides</i> /strain<br>M)                                                                | GGCGTCGCAGGCTTTCTGG         | 19 | 68.4 | 62.3 |
| 106 | Mcy459    | <i>Methylocystis</i>                                                                                                         | GTGATCACGGCGATTGTTGGTTC     | 23 | 52.2 | 60.2 |
| 107 | Mcy264    | <i>Methylocystis</i>                                                                                                         | CAGGCGTTCTGGTGGGTGAA        | 20 | 60.0 | 61.0 |
| 108 | Mcy270    | <i>Methylocystis</i>                                                                                                         | TTCTGGTGGGTGAACTCCGTCT      | 23 | 52.2 | 61.8 |
| 109 | Mcy413    | <i>Methylocystis</i>                                                                                                         | TTCCGGCGATCTGGCTTGACG       | 21 | 61.9 | 63.2 |
| 110 | Mcy522    | <i>Methylocystis</i> A + peat                                                                                                | GGCGATTGCGGCGTTCCA          | 18 | 66.7 | 62.3 |

| clones |           |                                                                                                     |                           |    |      |      |
|--------|-----------|-----------------------------------------------------------------------------------------------------|---------------------------|----|------|------|
| 111    | Mcy233    | <i>Methylocystis</i>                                                                                | ATTCTCGGCGTGACCTTCTGC     | 21 | 57.1 | 60.9 |
| 112    | McyM309   | <i>M.cystis</i> strain M and related                                                                | GGTTCTGGGCTGATGATCGG      | 21 | 61.9 | 61.0 |
| 113    | Peat264   | peat clones                                                                                         | GGCGTTTTTCTGGGTCAACTTCC   | 23 | 52.2 | 60.3 |
| 114    | MsS314    | <i>Methylosinus sporium</i>                                                                         | GGTTCTGGGTCTGCTCATCGG     | 21 | 61.9 | 60.8 |
| 115    | MsS475    | <i>Methylosinus sporium</i>                                                                         | TGGTCGGCGCCCTGGGCT        | 18 | 77.8 | 68.3 |
| 116    | Msi263    | <i>Methylosinus sporium</i> + 1<br><i>Msi.trichosporium</i><br>subcluster                           | GGCGTTCCTGTGGGAGAACTTC    | 22 | 59.1 | 61.2 |
| 117    | Msi423    | <i>Methylosinus</i>                                                                                 | CTGTGGCTGGACATCATCCTGC    | 22 | 59.1 | 61.4 |
| 118    | MsT214    | <i>Methylosinus trichosporium</i><br>OB3b and rel.                                                  | TGGCCGACCGTGGTTCCG        | 18 | 72.2 | 63.5 |
| 119    | Msi520    | <i>Methylosinus trichosporium</i>                                                                   | GCGATCGCGGCTCTGCA         | 17 | 70.6 | 61.6 |
| 120    | Msi269    | <i>Methylosinus trichosporium</i>                                                                   | TCTTCTGGGAGAACTTCAAGCTGC  | 24 | 50.0 | 60.6 |
| 121    | Msi294    | <i>Methylosinus</i>                                                                                 | GTTCGGCGCGACCTTCGC        | 18 | 72.2 | 62.5 |
| 122    | ARC2-518  | Deep branching type II<br>clade ARC2 - <i>Methylosinus</i><br><i>trichosporium</i> 15-084<br>group? | GGCCGGCGATTGGTCAGTATCA    | 22 | 59.1 | 61.7 |
| 123    | Msi232    | <i>M.sinus</i> + most <i>M.cystis</i> -<br>considered as additional<br>type II probe                | ATCCTGGGCGTGACCTTCGC      | 20 | 65.0 | 63.3 |
| 124    | II509     | Type II                                                                                             | CGAACAACTGGCCGGCGAT       | 19 | 63.2 | 61.7 |
| 125    | II630     | Type II                                                                                             | CATGGTCGAGCGCGGCAC        | 18 | 72.2 | 62.4 |
| 126    | Alp8-468  | Type II novel <i>pmoA</i> , Alpine<br>cluster Alp#8                                                 | CGCGCTCCTTGGCTCGTTGG      | 20 | 70.0 | 64.0 |
| 127    | xb6-539   | Novel <i>pmoA</i> copy of type II<br>and related environmental<br>clones                            | AGGCCGCCGAGGTCGAC         | 17 | 76.5 | 63.0 |
| 128    | LP21-190  | Novel <i>pmoA</i> copy of type II<br>and related environmental<br>clones                            | ATCGACTTCAAGGATCGCCG      | 20 | 55.0 | 58.2 |
| 129    | LP21-260  | Novel <i>pmoA</i> copy of type II<br>and related environmental<br>clones                            | CGCAGTCCTTCTTCTGGACG      | 20 | 60.0 | 58.6 |
| 130    | NMcy1-247 | Novel <i>pmoA</i> copy of<br><i>M.cystis</i> #1 (?)                                                 | TCGACATCGTGCTGATGATCTCGG  | 24 | 54.2 | 62.1 |
| 131    | NMsi1-469 | Novel <i>pmoA</i> copy of<br><i>M.sinus</i>                                                         | GCGCTGGTCGGCTCCATGG       | 19 | 73.7 | 64.3 |
| 132    | NMcy2-262 | Novel <i>pmoA</i> copy of<br><i>M.cystis</i> #2 (?)                                                 | CAGTCCTTCTTCTGGCAGAAGTTCC | 25 | 52.0 | 60.9 |
| 133    | LP21-436  | <i>Mcy</i> + <i>Msi</i> novel <i>pmoA</i> #1<br>groups                                              | GTGCTGATGATGTCGGGCAGCTGGC | 25 | 64.0 | 66.1 |
| 134    | NMsiT-271 | Novel <i>pmoA</i> copy of<br><i>M.sinus trichosporium</i> (?)                                       | AGCGCTTCCGTCTGCCGAT       | 19 | 63.2 | 62.9 |
| 135    | LP21-232  | Novel <i>pmoA</i> copy of type II<br>and related environmental<br>clones                            | ATCGTCGCCATGTGCTTCGC      | 20 | 60.0 | 61.9 |
| 136    | RA14-299  | RA14 related clones                                                                                 | GCGCGACGTTCTTTGTGTC       | 20 | 60.0 | 59.5 |
| 137    | RA14-594  | RA14 related clones                                                                                 | CCACAACGTTCTGACCTCGA      | 20 | 55.0 | 57.9 |
| 138    | RA14-591  | RA14 related clones                                                                                 | GGCTTCCACAACGTTCTGACCT    | 22 | 54.5 | 60.9 |
| 139    | Wsh1-566  | Watershed + flodded<br>upland cluster 1                                                             | GCTCATGAGCTTGGCCGACATC    | 22 | 59.1 | 61.8 |
| 140    | Wsh2-491  | Watershed + flodded<br>upland cluster 2                                                             | TCATTTGGCCAACCTCTCTCATTCC | 25 | 48.0 | 60.9 |
| 141    | Wsh2-450  | Watershed + flodded<br>upland cluster 2                                                             | CAAGAGCTGGATCATCACGATG    | 22 | 50.0 | 56.8 |
| 142    | B2rel251  | <i>Methylocapsa</i> -related<br>clones                                                              | CCGCCGCGGCCAGTATTA        | 19 | 68.4 | 63.4 |
| 143    | B2-400    | <i>Methylocapsa</i>                                                                                 | ACCTCTTTGGTCCCGGCTGC      | 20 | 65.0 | 63.4 |
| 144    | B2-261    | <i>Methylocapsa</i>                                                                                 | TCAGGCCTATTTCTGGGAAAGCT   | 23 | 47.8 | 58.3 |
| 145    | B2all343  | <i>Methylocapsa</i> and related<br>clones                                                           | AACCGCTACACCAATTTCTGGGG   | 23 | 52.2 | 61.2 |
| 146    | B2all341  | <i>Methylocapsa</i> and related                                                                     | TCAACCGCTACACCAATTTCTGGG  | 24 | 50.0 | 61.1 |

| clones |             |                                                                    |                              |    |      |      |
|--------|-------------|--------------------------------------------------------------------|------------------------------|----|------|------|
| 147    | pmoAMO3-400 | clone pmoA-MO3                                                     | ACCCAGATGATCCCGTCGGC         | 20 | 65.0 | 62.6 |
| 148    | pmoAMO3-486 | MO3 group                                                          | ggGATGGGGCCTTCTCATGTACC      | 23 | 60.9 | 61.5 |
| 149    | pmoAMO3-511 | MO3 group                                                          | AGCAACTGGCAGGTCTCTCG         | 19 | 63.2 | 60.2 |
| 150    | Ver330      | <i>Verrucomicrobia</i> , all pmoA1+pmoA2                           | TGGTCAGTGGATGAATAGGTATTGGA   | 26 | 42.3 | 57.3 |
| 151    | Ver307      | <i>Verrucomicrobia</i> , all pmoA2                                 | TTCAGCTGTGCCGGATTGTTTT       | 22 | 45.5 | 57.9 |
| 152    | Ver285      | <i>Verrucomicrobia</i> , <i>Ma.fum</i> pmoA2+ <i>Ma.kam.</i> pmoA2 | TAAAGCGCCTATAGGAGCAACCT      | 23 | 47.8 | 58.0 |
| 153    | Ma_F1-355   | <i>Ma.fum.</i> pmoA1                                               | AACTTCTGGGGTTGGGGCACTT       | 22 | 54.5 | 61.5 |
| 154    | Ma_F1-594   | <i>Ma.fum.</i> pmoA1                                               | TGAATACATCCGGACTTCTACCCC     | 24 | 50.0 | 57.9 |
| 155    | Ma_I1-312   | <i>Ma.inf.</i> pmoA1                                               | AACCGTTGGGCTTTTCTTTGGC       | 22 | 50.0 | 59.1 |
| 156    | Ma_I1-401   | <i>Ma.inf.</i> pmoA1                                               | AAACATTAATCCCCAGGCTGTCTGT    | 25 | 44.0 | 58.9 |
| 157    | Ma_F3-638   | <i>Ma.fum.</i> pmoA3                                               | AAAGTGGGACTCTTCGGACCTT       | 22 | 50.0 | 58.1 |
| 158    | Ma_F3-542   | <i>Ma.fum.</i> pmoA3                                               | AACCCTTAGAAGCCTTAGGCCA       | 22 | 50.0 | 58.1 |
| 159    | ESR-579     | ESR (Eastern Snake River) cluster                                  | GACCTGATCGGATTCGAGAACATC     | 24 | 50.0 | 58.5 |
| 160    | M84P22-514  | environmental clones of uncertain identity                         | AACTGGGCCTGGCTGGG            | 17 | 70.6 | 61.0 |
| 161    | TUSC409     | Tropical Upland Soil Cluster #2                                    | CGATCCCGGGCGCGATTC           | 18 | 72.2 | 61.8 |
| 162    | TUSC502     | Tropical Upland Soil Cluster #2                                    | TCTTCTACTTCGGCAACTGGC        | 21 | 52.4 | 58.3 |
| 163    | mtrof173    | Universal                                                          | GGbGACTGGGACTTCTGG           | 18 | 66.7 | 57.4 |
| 164    | mtrof362-l  | Methanotrophs                                                      | TGGGGCTGGACCTACTTCC          | 19 | 63.2 | 59.5 |
| 165    | mtrof661    | Methanotrophs                                                      | GGTAARGACGTTGCKCCGG          | 19 | 63.2 | 60.4 |
| 166    | mtrof662-l  | Methanotrophs                                                      | GGTAAGGACGTTGCGCCGG          | 19 | 68.4 | 61.9 |
| 167    | mtrof656    | Methanotrophs                                                      | ACCTTCGGTAAGGACGT            | 17 | 52.9 | 53.2 |
| 168    | NmNc533     | <i>Nitrosomonas-Nitrosococcus</i>                                  | CAACCCATTTGCCAATCGTTGTAG     | 24 | 45.8 | 58.6 |
| 169    | Nsm_eut381  | <i>Nitrosomonas eutropha</i>                                       | CCACTCAATTTTGTAAACCCAGGTAT   | 26 | 42.3 | 59.0 |
| 170    | PS5-226     | <i>Nitrosococcus</i> related clones                                | ACCCCGATTGTTGGGATGATGTA      | 23 | 47.8 | 59.9 |
| 171    | PI6-306     | <i>Nitrosomonas-Nitrosococcus</i> related clones                   | GGCACTCTGTATCGTATGCCTGTTAG   | 26 | 50.0 | 60.5 |
| 172    | NsNv207     | <i>Nitrosospira-Nitrosovibrio</i>                                  | TCAATGGTGGCCGGTGG            | 17 | 64.7 | 58.5 |
| 173    | NsNv363     | <i>Nitrosospira-Nitrosovibrio</i>                                  | TACTGGTGGTCGCACTACCC         | 20 | 60.0 | 59.6 |
| 174    | SV308       | Svalbard clade                                                     | TGAGCATCTCTGGGCTTGTCGT       | 22 | 54.5 | 60.7 |
| 175    | SVrel583    | Svalbard clade and related                                         | TACATGGGATTCACATTTGTGAGGAC   | 26 | 42.3 | 57.0 |
| 176    | Nit_rel471  | AOB related clones/probably methanotrophs                          | CGTTCGCGATGATGTTTGGTCC       | 22 | 54.5 | 60.1 |
| 177    | Sed585      | Ssed#1                                                             | GGGCATTTCGCGATGATGTTTTATCCGA | 27 | 48.1 | 61.2 |
| 178    | Sed422      | Ssed#1 and related                                                 | TGATCCTAGACTGCACCCTGTTG      | 23 | 52.2 | 58.5 |
| 179    | Nit_rel223  | AOB related clones/probably methanotrophs                          | GTCACACCGATCGTAGAGGT         | 20 | 55.0 | 56.9 |
| 180    | Nit_rel417  | Arctic soil related #1, subgroup                                   | CGCGTTGATCTTTGATTGCACCCTGTT  | 27 | 48.1 | 61.8 |
| 181    | Nit_rel419  | Arctic soil related #1, subgroup                                   | CGTTGATCCTTGATTGCACCCTGTT    | 25 | 48.0 | 59.8 |
| 182    | Nit_rel526  | JRC#1+CCd#1 groups                                                 | GCCATCAACCATTGGTTGCGGA       | 22 | 54.5 | 60.8 |
| 183    | Nit_rel652  | Arctic soil MOB                                                    | CGTACATTCGGTGGTCCACTG        | 22 | 54.5 | 57.9 |
| 184    | ARC529      | AOB related clones/probably methanotrophs                          | TAAGCAGCCGATGGTCGTGGAT       | 22 | 54.5 | 62.2 |
| 185    | Nit_rel470  | AOB related                                                        | CGATATTCGGGGTATGGGCG         | 20 | 60.0 | 58.4 |



|     |                  |                                                                             |                              |    |      |      |
|-----|------------------|-----------------------------------------------------------------------------|------------------------------|----|------|------|
|     |                  | clones/probably<br>methanotrophs<br>AOB related                             |                              |    |      |      |
| 186 | Nit_rel351       | clones/probably<br>methanotrophs                                            | GTTTGCCTGGTACTGGTGGG         | 20 | 60.0 | 59.2 |
| 187 | gp17-438         | <i>environmental clones of<br/>uncertain identity - gp17</i><br>AOB related | ACTCTTATTGACCAGGAATTGGACCTTG | 28 | 42.9 | 58.5 |
| 188 | Nit_rel304       | clones/probably<br>methanotrophs - <i>Crenothrix</i><br>and related         | CGCTCTGCATTCTGGCGCT          | 19 | 63.2 | 61.8 |
| 189 | NLw303           | environmental clones of<br>uncertain identity - NL<br>wetland               | AACGATCACTATTCTGGCTCTTGCCTTT | 28 | 42.9 | 60.1 |
| 190 | M84P105-<br>451  | environmental clones of<br>uncertain identity                               | AACAGCCTGACTGTCCACCAG        | 20 | 55.0 | 58.1 |
| 191 | WC306_54-<br>385 | environmental clones of<br>uncertain identity                               | AACGAAGTACTGCCGGCAAC         | 20 | 55.0 | 59.2 |
| 192 | WC306-54-<br>516 | environmental clones of<br>uncertain identity                               | AACTGGCCGATTTTTGGCATGTT      | 23 | 43.5 | 58.4 |
| 193 | gp23-454         | environmental clones of<br>uncertain identity                               | AACGCGCTGCTCACTGCG           | 18 | 66.7 | 62.3 |
| 194 | MR1-348          | environmental clones of<br>uncertain identity                               | AATCTTCGGTTGGCACGGCT         | 20 | 55.0 | 61.1 |
| 195 | gp619            | environmental clones of<br>uncertain identity                               | CGGAATATCTGCGCATCATCGAGC     | 24 | 54.2 | 61.5 |
| 196 | gp391            | environmental clones of<br>uncertain identity                               | ATCTGGCCGGCGACCATG           | 18 | 66.7 | 61.1 |
| 197 | gp2-581          | environmental clones of<br>uncertain identity                               | ACATGATCGGCTACGTGTATCCG      | 23 | 52.2 | 60.0 |
| 198 | RA21-466         | clone RA21 -<br>environmental clone of<br>uncertain identity                | CGGCGTTCTTGGCGGCAT           | 18 | 66.7 | 62.4 |
